# Supplementary material for: A new 3D luminescent Zn(ii)–organic framework containing a quinoline-2,6-dicarboxylate linker for the highly selective sensing of Fe(iii) ions
Source: Royal Society of Chemistry journal article supplement (doi:10.1039/c8dt04252g), 2018-12-27
Supplement: c8dt04252g1.pdf [file c8dt04252g1.pdf]

Electronic Supplementary Information (ESI) for Dalton Transactions This journal is © The Royal Society of Chemistry 2018

## Supporting Information For

### **A new 3D luminescent Zn(II)-organic framework containing quinoline-2,6-dicarboxylate linker for the highly selective sensing of Fe(III) ion**

*Chiranjib Gogoi,<sup>a</sup> Muhammed Yousufuddin<sup>b</sup> and Shyam Biswas<sup>\*a</sup>*

<sup>a</sup> Department of Chemistry, Indian Institute of Technology Guwahati, 781039, Assam, India.

<sup>b</sup> Life and Health Sciences Department, The University of North Texas at Dallas, Dallas, Texas 75241, United States.

\* To whom correspondence should be addressed. E-mail: sbiswas@iitg.ernet.in; Tel: 91-3612583309.

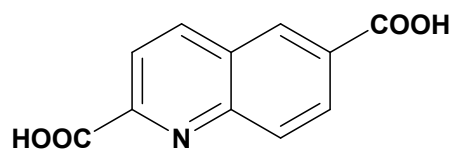

**Figure S1.** Ligand used for the present work.

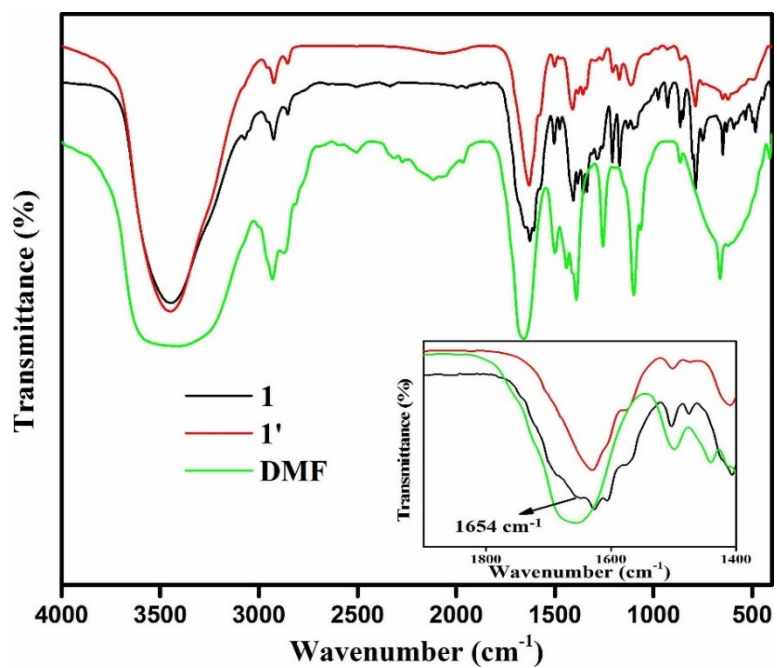

**Figure S2.** FT-IR spectra of compound 1 (black), 1' (red) and DMF (green).

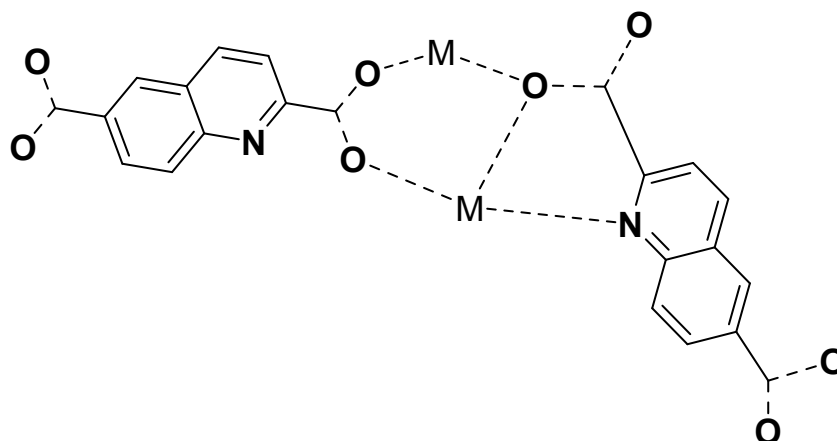

**Scheme S1.** Coordination and *bis*-chelation mode displayed by QDA ligand in compound 1.

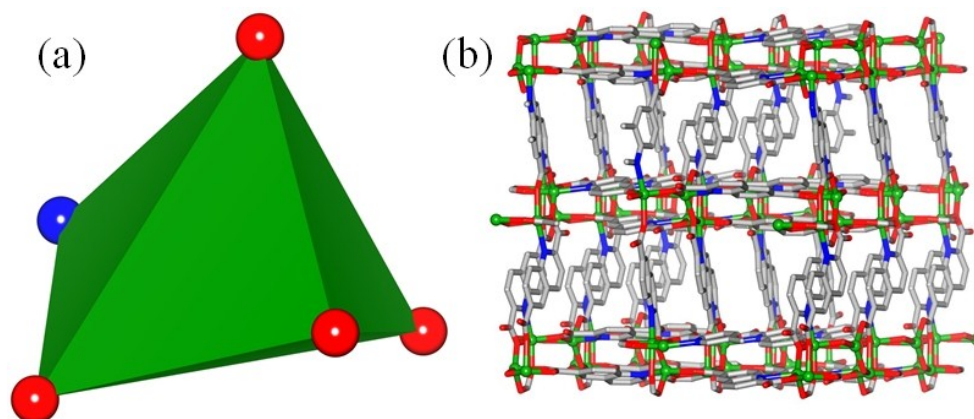

**Figure S3.** (a) Metal-organic square pyramidal polyhedra found within compound **1** constructed via coordination of QDA ligands with  $Zn^{2+}$  ions. (b) Side view of the overall 3D framework of compound **1**.

**Table S1.** Single-crystal X-ray data and structure refinement parameters for compound **1**.

|                                      |                                  |
|--------------------------------------|----------------------------------|
| Formula                              | $C_{11}H_5NO_4Zn$                |
| Formula Weight                       | 280.53                           |
| Crystal System                       | Tetragonal                       |
| Space group                          | $I4_1/a$                         |
| $a/\text{\AA}$                       | 19.9088(3)                       |
| $b/\text{\AA}$                       | 19.9088(3)                       |
| $c/\text{\AA}$                       | 12.1905(3)                       |
| $V/\text{\AA}^3$                     | 4831.83(19)                      |
| $Z$                                  | 16                               |
| $D_e/\text{g cm}^{-3}$               | 1.543                            |
| $\mu$ Mo $K_\alpha/\text{mm}^{-1}$   | 2.033                            |
| F000                                 | 2240.0                           |
| T/K                                  | 293(2)                           |
| Theta range                          | 2.894 to 28.697°                 |
| Total no. of reflections             | 5395                             |
| Independent reflections              | 2747 [R(int) = 0.0174]           |
| Observed reflections                 | 1830                             |
| Parameters refined                   | 154                              |
| Final R indices [I > 2 $\sigma$ (I)] | $R_1 = 0.0274$ , $wR_2 = 0.0671$ |
| R indices (all data)                 | $R_1 = 0.0378$ , $wR_2 = 0.0723$ |

|                                |                                             |
|--------------------------------|---------------------------------------------|
| GOF (F <sup>2</sup> )          | 1.049                                       |
| Crystal Size                   | 0.26 × 0.24 × 0.22 mm <sup>3</sup>          |
| Index ranges                   | -26 ≤ h ≤ 13, -21 ≤ k ≤ 25, -16 ≤ l ≤ 8     |
| Absorption correction          | Semi-empirical from equivalents             |
| Max. and min. transmission     | 0.639 and 0.595                             |
| Refinement method              | Full-matrix least-squares on F <sup>2</sup> |
| Data / restraints / parameters | 2747 / 0 / 154                              |
| Extinction coefficient         | n/a                                         |
| Largest diff. peak and hole    | 0.379 and -0.207 e.Å <sup>-3</sup>          |

**Table S2.** Atomic coordinates ( × 10<sup>4</sup>) and equivalent isotropic displacement parameters (Å<sup>2</sup> × 10<sup>3</sup>) for compound **1**. U(eq) is defined as one third of the trace of the orthogonalized U<sup>ij</sup> tensor.

|       |         |         |         |       |
|-------|---------|---------|---------|-------|
| Zn(1) | 7017(1) | 449(1)  | 1674(1) | 28(1) |
| O(13) | 6705(1) | 4077(1) | 9034(1) | 50(1) |
| O(14) | 6899(1) | 4606(1) | 7464(1) | 32(1) |
| O(16) | 7059(1) | 550(1)  | 4253(1) | 52(1) |
| O(17) | 6993(1) | 1190(1) | 2745(1) | 45(1) |
| C(2)  | 6773(1) | 3427(1) | 7404(2) | 35(1) |
| C(3)  | 6628(1) | 2822(1) | 7940(2) | 51(1) |
| C(4)  | 6632(2) | 2242(1) | 7344(2) | 55(1) |
| C(5)  | 6783(1) | 2265(1) | 6215(2) | 40(1) |
| C(6)  | 6822(1) | 1678(1) | 5562(2) | 46(1) |
| C(7)  | 6968(1) | 1723(1) | 4465(2) | 38(1) |
| C(8)  | 7066(1) | 2359(1) | 3987(2) | 45(1) |
| C(9)  | 7048(1) | 2929(1) | 4597(2) | 42(1) |
| C(10) | 6912(1) | 2898(1) | 5731(2) | 34(1) |
| N(11) | 6904(1) | 3474(1) | 6339(1) | 31(1) |
| C(12) | 6785(1) | 4075(1) | 8043(2) | 35(1) |
| C(15) | 7016(1) | 1097(1) | 3773(2) | 39(1) |

**Table S3.** Bond lengths [Å] and angles [°] for compound **1**.

---

|                       |            |
|-----------------------|------------|
| Zn(1)-O(17)           | 1.9708(15) |
| Zn(1)-O(14)#1         | 1.9941(14) |
| Zn(1)-O(14)#2         | 2.0266(15) |
| Zn(1)-O(16)#3         | 2.0599(15) |
| Zn(1)-N(11)#2         | 2.1875(17) |
| O(13)-C(12)           | 1.218(3)   |
| O(14)-C(12)           | 1.293(3)   |
| O(16)-C(15)           | 1.239(3)   |
| O(17)-C(15)           | 1.268(3)   |
| C(2)-N(11)            | 1.327(3)   |
| C(2)-C(3)             | 1.400(3)   |
| C(2)-C(12)            | 1.507(3)   |
| C(3)-C(4)             | 1.365(3)   |
| C(3)-H(3)             | 0.9300     |
| C(4)-C(5)             | 1.409(3)   |
| C(4)-H(4)             | 0.9300     |
| C(5)-C(10)            | 1.415(3)   |
| C(5)-C(6)             | 1.416(3)   |
| C(6)-C(7)             | 1.372(3)   |
| C(6)-H(6)             | 0.9300     |
| C(7)-C(8)             | 1.408(3)   |
| C(7)-C(15)            | 1.508(3)   |
| C(8)-C(9)             | 1.356(3)   |
| C(8)-H(8)             | 0.9300     |
| C(9)-C(10)            | 1.410(3)   |
| C(9)-H(9)             | 0.9300     |
| C(10)-N(11)           | 1.367(3)   |
|                       |            |
| O(17)-Zn(1)-O(14)#1   | 106.11(7)  |
| O(17)-Zn(1)-O(14)#2   | 122.89(6)  |
| O(14)#1-Zn(1)-O(14)#2 | 130.95(7)  |
| O(17)-Zn(1)-O(16)#3   | 89.95(7)   |
| O(14)#1-Zn(1)-O(16)#3 | 94.94(7)   |
| O(14)#2-Zn(1)-O(16)#3 | 87.69(6)   |
| O(17)-Zn(1)-N(11)#2   | 93.79(7)   |
| O(14)#1-Zn(1)-N(11)#2 | 98.72(6)   |

|                       |            |
|-----------------------|------------|
| O(14)#2-Zn(1)-N(11)#2 | 77.41(6)   |
| O(16)#3-Zn(1)-N(11)#2 | 164.22(7)  |
| C(12)-O(14)-Zn(1)#4   | 114.92(13) |
| C(12)-O(14)-Zn(1)#5   | 119.50(13) |
| Zn(1)#4-O(14)-Zn(1)#5 | 125.16(7)  |
| C(15)-O(16)-Zn(1)#6   | 148.75(17) |
| C(15)-O(17)-Zn(1)     | 123.03(15) |
| N(11)-C(2)-C(3)       | 123.9(2)   |
| N(11)-C(2)-C(12)      | 116.22(18) |
| C(3)-C(2)-C(12)       | 119.9(2)   |
| C(4)-C(3)-C(2)        | 118.6(2)   |
| C(4)-C(3)-H(3)        | 120.7      |
| C(2)-C(3)-H(3)        | 120.7      |
| C(3)-C(4)-C(5)        | 119.6(2)   |
| C(3)-C(4)-H(4)        | 120.2      |
| C(5)-C(4)-H(4)        | 120.2      |
| C(4)-C(5)-C(10)       | 118.4(2)   |
| C(4)-C(5)-C(6)        | 122.2(2)   |
| C(10)-C(5)-C(6)       | 119.4(2)   |
| C(7)-C(6)-C(5)        | 120.4(2)   |
| C(7)-C(6)-H(6)        | 119.8      |
| C(5)-C(6)-H(6)        | 119.8      |
| C(6)-C(7)-C(8)        | 119.5(2)   |
| C(6)-C(7)-C(15)       | 120.4(2)   |
| C(8)-C(7)-C(15)       | 120.2(2)   |
| C(9)-C(8)-C(7)        | 121.4(2)   |
| C(9)-C(8)-H(8)        | 119.3      |
| C(7)-C(8)-H(8)        | 119.3      |
| C(8)-C(9)-C(10)       | 120.4(2)   |
| C(8)-C(9)-H(9)        | 119.8      |
| C(10)-C(9)-H(9)       | 119.8      |
| N(11)-C(10)-C(9)      | 119.9(2)   |
| N(11)-C(10)-C(5)      | 121.27(19) |
| C(9)-C(10)-C(5)       | 118.9(2)   |
| C(2)-N(11)-C(10)      | 118.28(18) |
| C(2)-N(11)-Zn(1)#5    | 111.91(14) |
| C(10)-N(11)-Zn(1)#5   | 129.80(14) |
| O(13)-C(12)-O(14)     | 124.2(2)   |

|                   |            |
|-------------------|------------|
| O(13)-C(12)-C(2)  | 120.9(2)   |
| O(14)-C(12)-C(2)  | 114.91(19) |
| O(16)-C(15)-O(17) | 126.7(2)   |
| O(16)-C(15)-C(7)  | 117.8(2)   |
| O(17)-C(15)-C(7)  | 115.5(2)   |

---

Symmetry transformations used to generate equivalent atoms:

#1  $x, y-1/2, -z+1$  #2  $y+1/4, -x+3/4, -z+3/4$  #3  $y+3/4, -x+3/4, z-1/4$

#4  $x, y+1/2, -z+1$  #5  $-y+3/4, x-1/4, -z+3/4$  #6  $-y+3/4, x-3/4, z+1/4$

**Table S4.** Anisotropic displacement parameters ( $\text{\AA}^2 \times 10^3$ ) for compound **1**. The anisotropic displacement factor exponent takes the form:  $-2\pi^2 [ h^2 a^*2U^{11} + \dots + 2 h k a^* b^* U^{12} ]$

|       | U11   | U22   | U33   | U23   | U13    | U12    |
|-------|-------|-------|-------|-------|--------|--------|
| Zn(1) | 29(1) | 29(1) | 26(1) | 2(1)  | 0(1)   | -1(1)  |
| O(13) | 72(1) | 47(1) | 31(1) | -3(1) | 10(1)  | -2(1)  |
| O(14) | 40(1) | 27(1) | 29(1) | -2(1) | 5(1)   | -2(1)  |
| O(16) | 88(1) | 26(1) | 43(1) | -3(1) | -11(1) | 2(1)   |
| O(17) | 63(1) | 35(1) | 37(1) | -9(1) | -2(1)  | 0(1)   |
| C(2)  | 41(1) | 32(1) | 32(1) | 0(1)  | 5(1)   | -4(1)  |
| C(3)  | 81(2) | 41(1) | 31(1) | 2(1)  | 11(1)  | -10(1) |
| C(4)  | 89(2) | 33(1) | 42(1) | 6(1)  | 8(1)   | -8(1)  |
| C(5)  | 57(2) | 31(1) | 34(1) | 2(1)  | 2(1)   | -4(1)  |
| C(6)  | 67(2) | 29(1) | 42(1) | 0(1)  | -3(1)  | -4(1)  |
| C(7)  | 46(1) | 31(1) | 37(1) | -3(1) | -2(1)  | 1(1)   |
| C(8)  | 67(2) | 35(1) | 35(1) | -5(1) | 11(1)  | -5(1)  |
| C(9)  | 63(2) | 28(1) | 36(1) | 1(1)  | 10(1)  | -5(1)  |
| C(10) | 38(1) | 29(1) | 34(1) | 0(1)  | 2(1)   | -2(1)  |
| N(11) | 37(1) | 27(1) | 30(1) | 0(1)  | 3(1)   | -3(1)  |
| C(12) | 35(1) | 36(1) | 34(1) | -2(1) | 5(1)   | 1(1)   |
| C(15) | 43(1) | 32(1) | 41(1) | -7(1) | -3(1)  | -2(1)  |



**Table S5.** Hydrogen coordinates ( $\times 10^4$ ) and isotropic displacement parameters ( $\text{\AA}^2 \times 10^3$ ) for compound **1**.

|      | x    | y    | z    | U(eq) |
|------|------|------|------|-------|
| H(3) | 6531 | 2816 | 8686 | 61    |
| H(4) | 6536 | 1834 | 7680 | 66    |
| H(6) | 6748 | 1260 | 5879 | 55    |
| H(8) | 7147 | 2390 | 3237 | 55    |
| H(9) | 7124 | 3342 | 4265 | 51    |

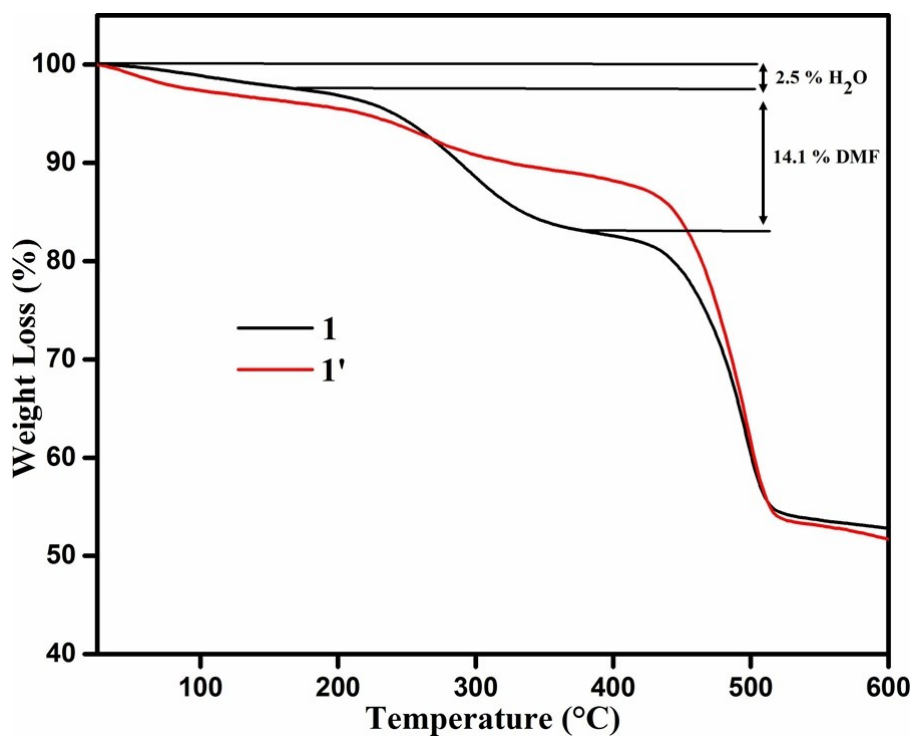

**Figure S4.** TG curves of **1** and **1'** recorded in an argon atmosphere in the temperature range of 25-600 °C with a heating rate of 10 °C/min.

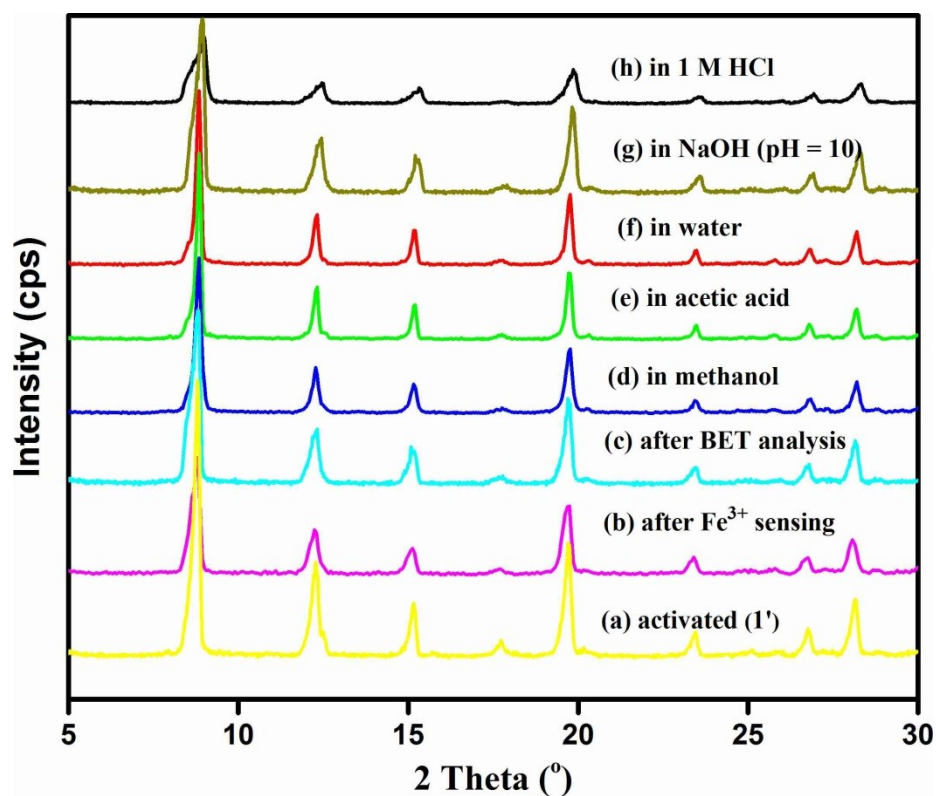

**Figure S5.** XRPD patterns of compound **1** in different forms: (a) activated, (b) after 5 cycles of fluorescence titration experiments with  $\text{Fe}^{3+}$  solution, (c) after BET analysis, (d) after treatment with methanol, (e) after treatment with acetic acid, (f) after treatment with water, (g) after treatment with NaOH solution (pH = 10), and (h) after treatment with 1(M) HCl.

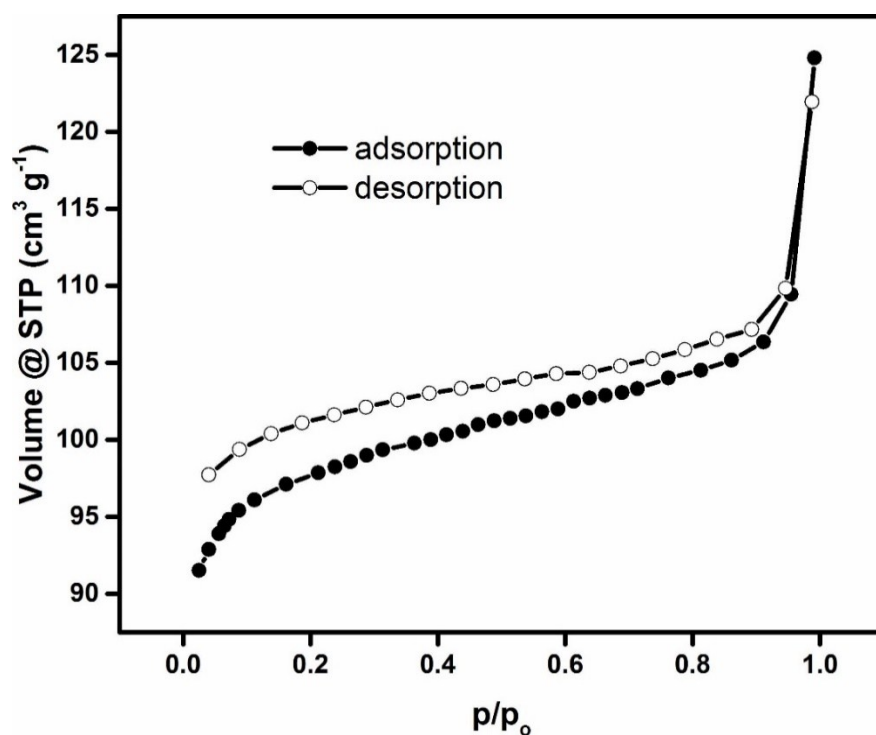

**Figure S6.**  $\text{N}_2$  adsorption (filled circles) and desorption (empty circles) isotherms of thermally activated **1'** measured at  $-196\text{ }^\circ\text{C}$ .

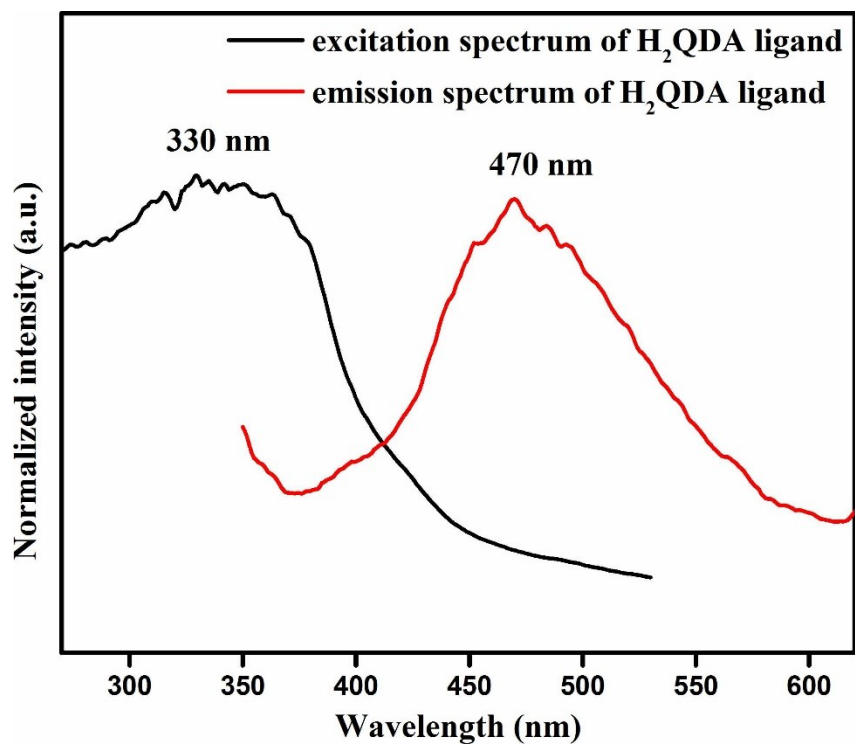

**Figure S7.** Fluorescence excitation and emission spectra of H<sub>2</sub>QDA ligand in the solid state.

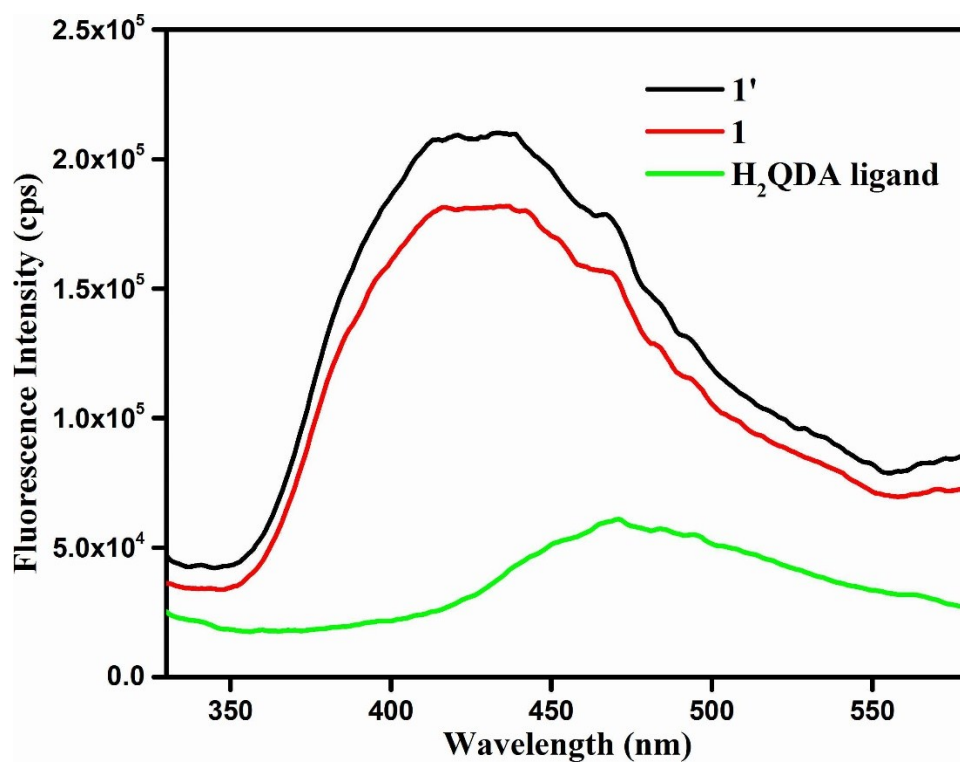

**Figure S8.** Fluorescence emission spectra of 1, 1' and H<sub>2</sub>QDA ligand in the solid state ( $\lambda_{\text{ex}} = 310$  nm).

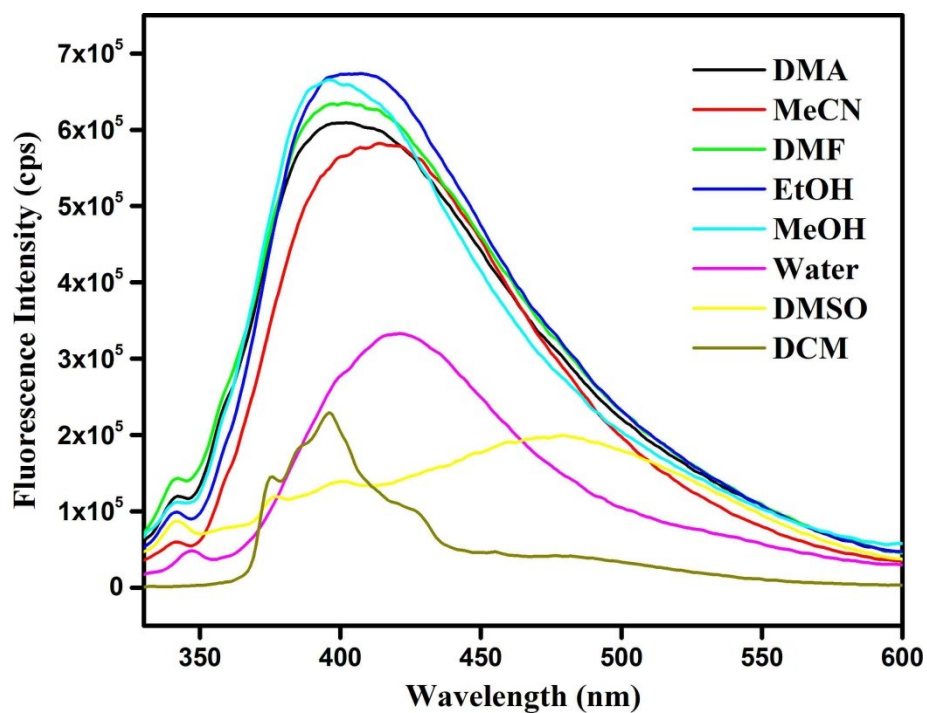

**Figure S9.** Fluorescence emission spectra of **1'** in common organic solvents ( $\lambda_{\text{ex}} = 310 \text{ nm}$ ).

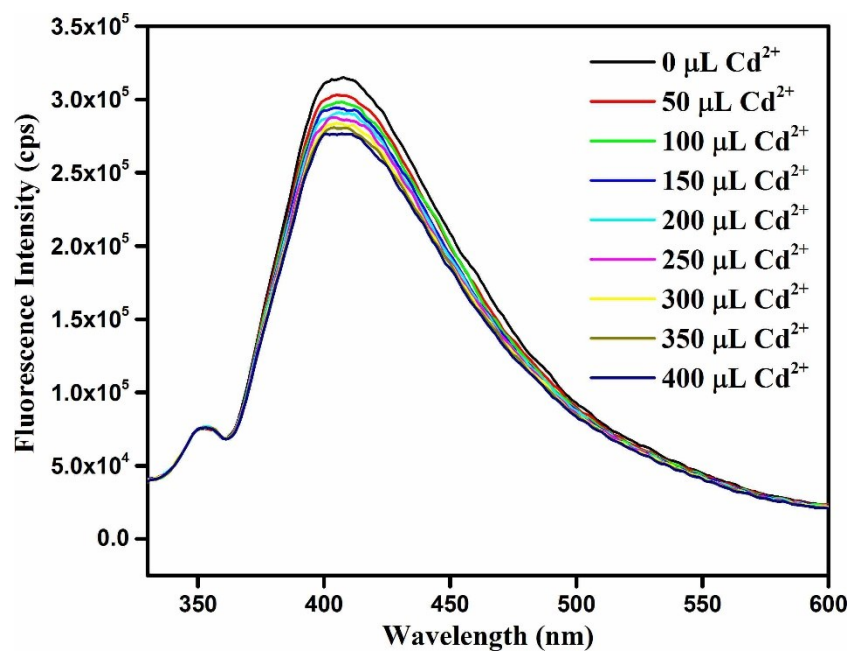

**Figure S10.** Change in the fluorescence intensity of **1'** upon incremental addition of 10 mM  $\text{Cd}^{2+}$  solution.

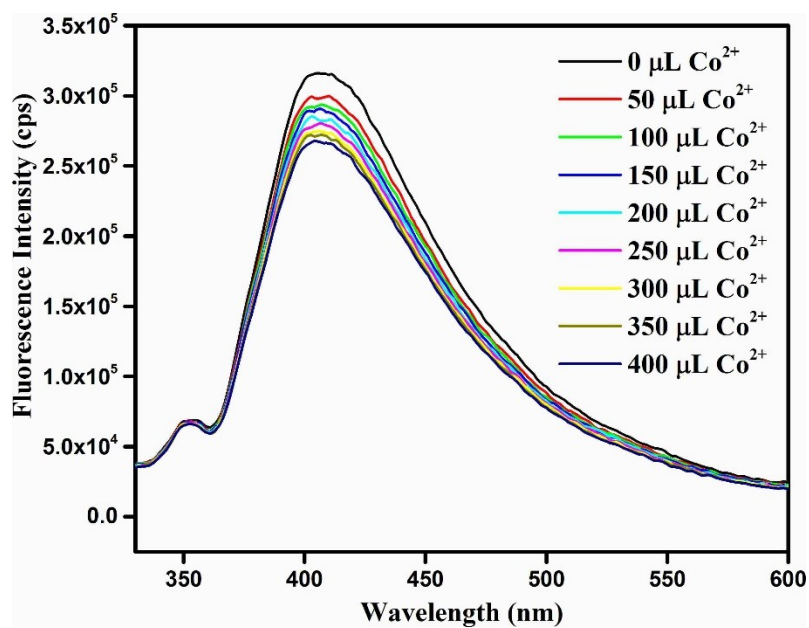

**Figure S11.** Change in the fluorescence intensity of **1'** upon incremental addition of 10 mM Co<sup>2+</sup> solution.

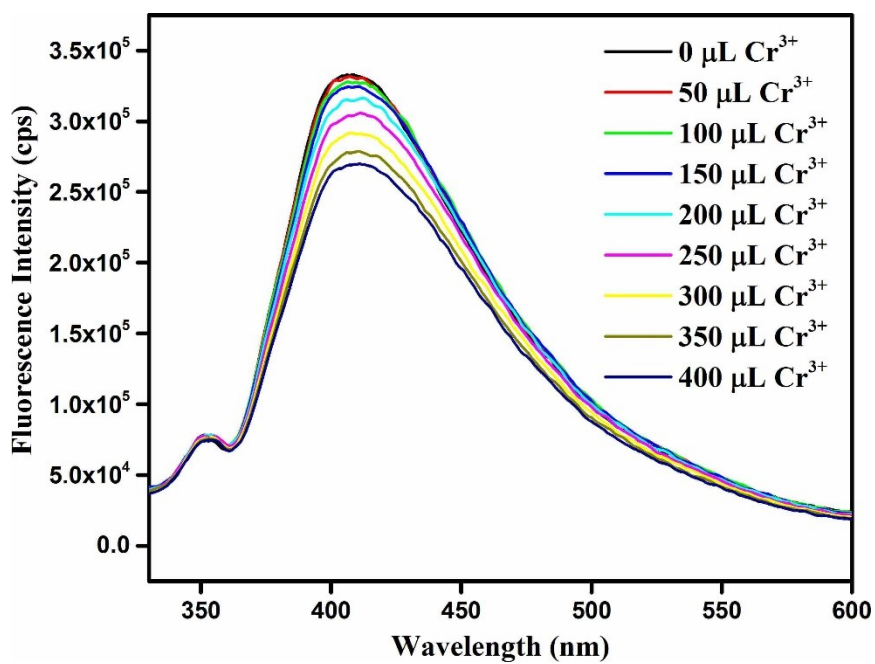

**Figure S12.** Change in the fluorescence intensity of **1'** upon incremental addition of 10 mM Cr<sup>3+</sup> solution.

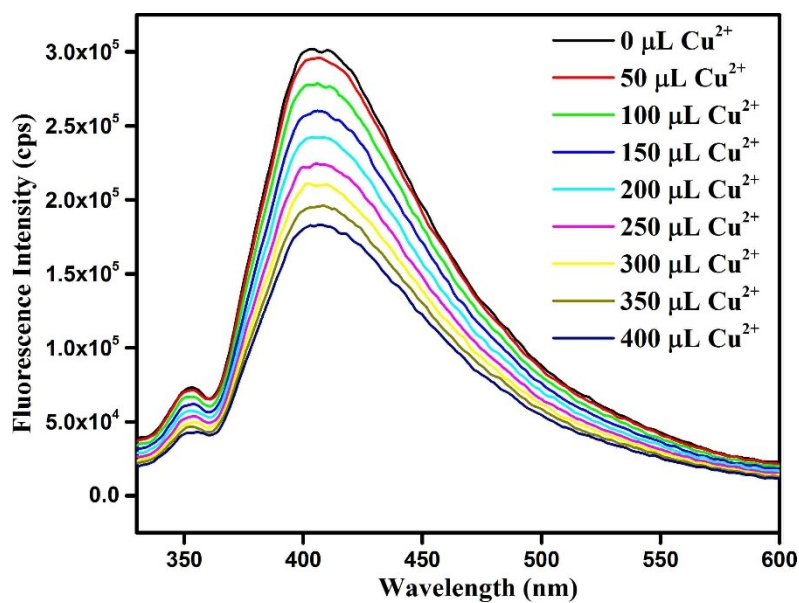

**Figure S13.** Change in the fluorescence intensity of **1'** upon incremental addition of 10 mM  $\text{Cu}^{2+}$  solution.

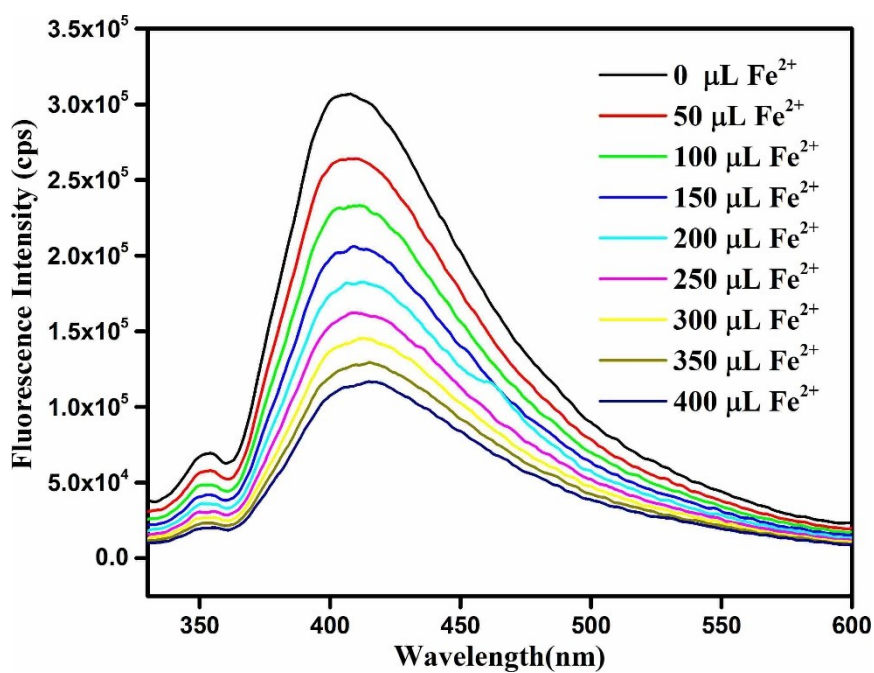

**Figure S14.** Change in the fluorescence intensity of **1'** upon incremental addition of 10 mM  $\text{Fe}^{2+}$  solution.

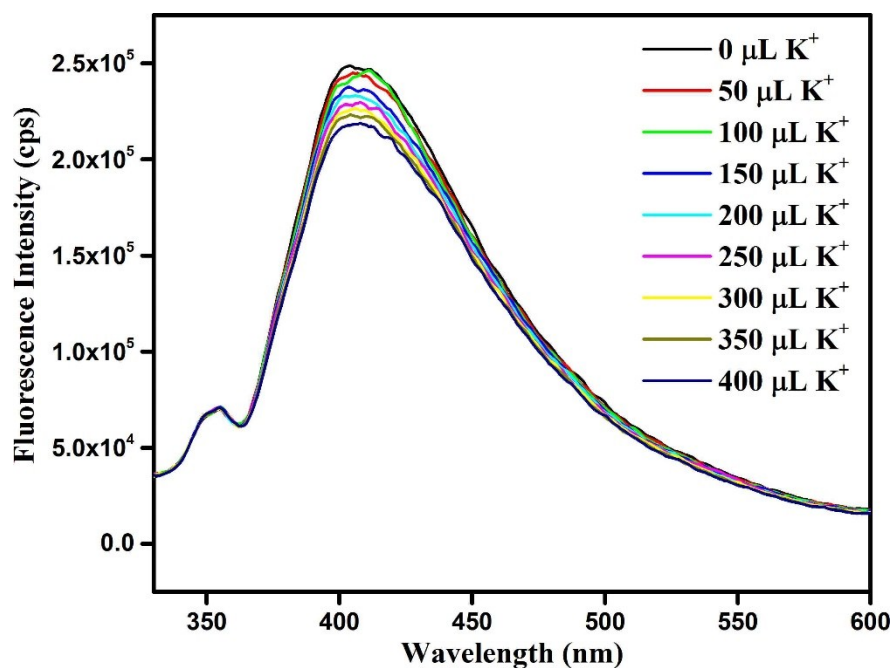

**Figure S15.** Change in the fluorescence intensity of **1'** upon incremental addition of 10 mM K<sup>+</sup> solution.

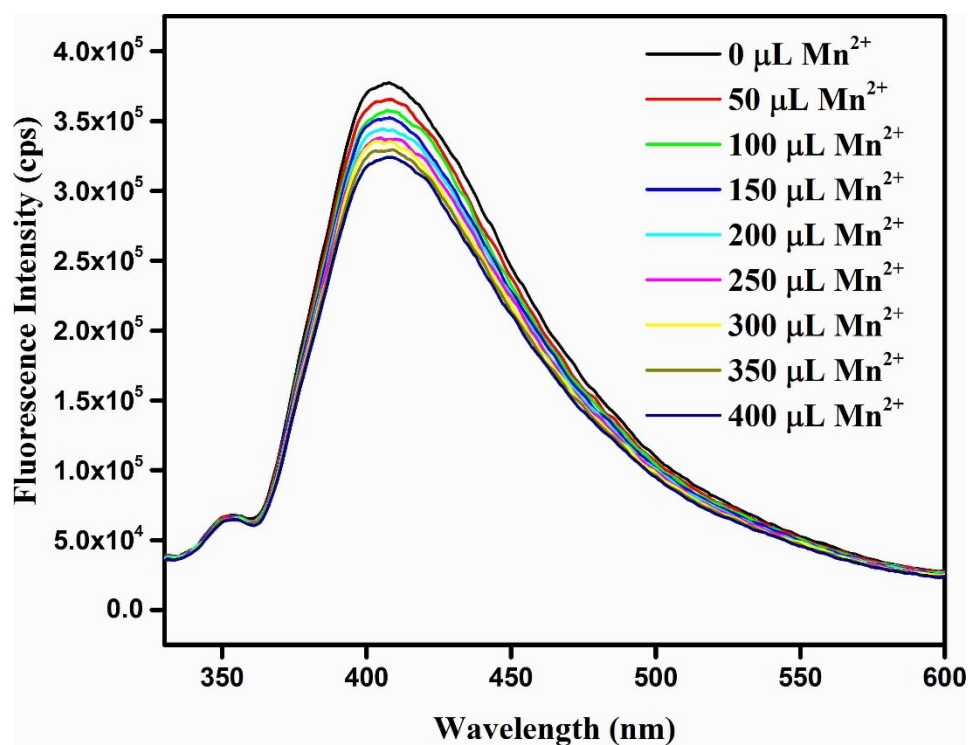

**Figure S16.** Change in the fluorescence intensity of **1'** upon incremental addition of 10 mM Mn<sup>2+</sup> solution.

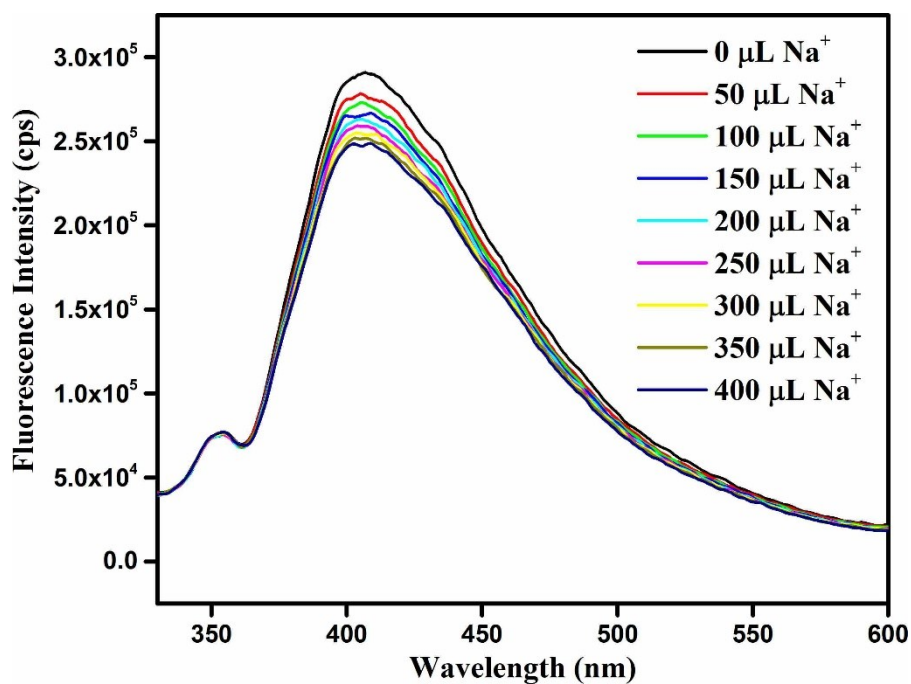

**Figure S17.** Change in the fluorescence intensity of **1'** upon incremental addition of 10 mM Na<sup>+</sup> solution.

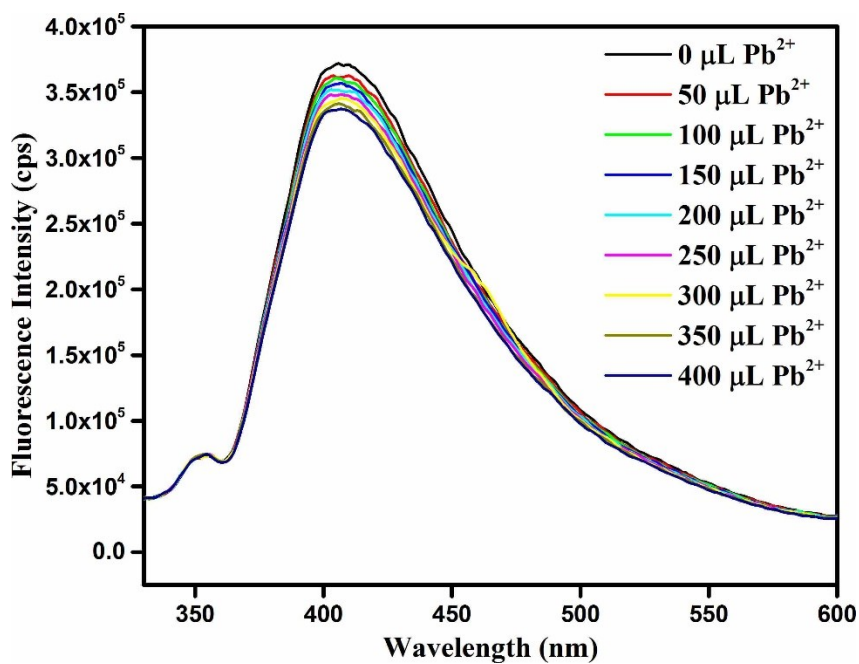

**Figure S18.** Change in the fluorescence intensity of **1'** upon incremental addition of 10 mM Pb<sup>2+</sup> solution.



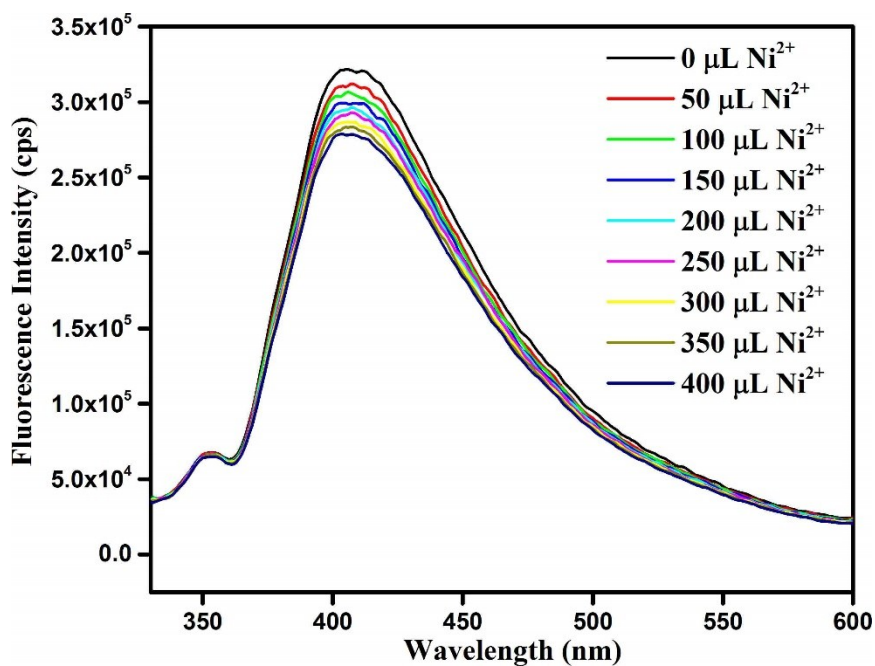

**Figure S19.** Change in the fluorescence intensity of **1'** upon incremental addition of 10 mM Ni<sup>2+</sup> solution.

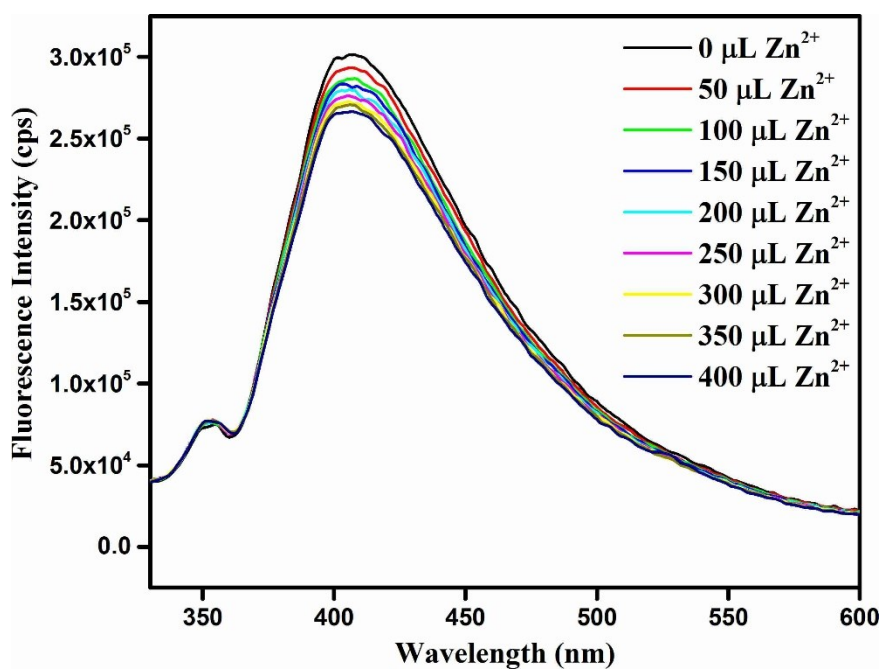

**Figure S20.** Change in the fluorescence intensity of **1'** upon incremental addition of 10 mM Zn<sup>2+</sup> solution.

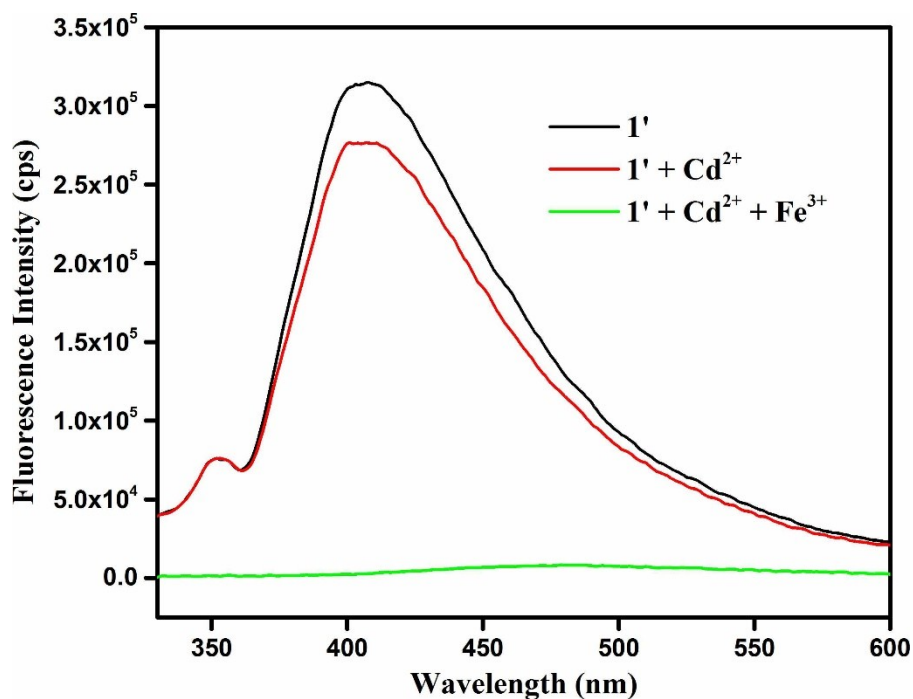

**Figure S21.** Change in the fluorescence intensity of **1'** upon addition of 10 mM Cd<sup>2+</sup> solution (400  $\mu$ L) in presence of 10 mM Fe<sup>3+</sup> (400  $\mu$ L) solution.

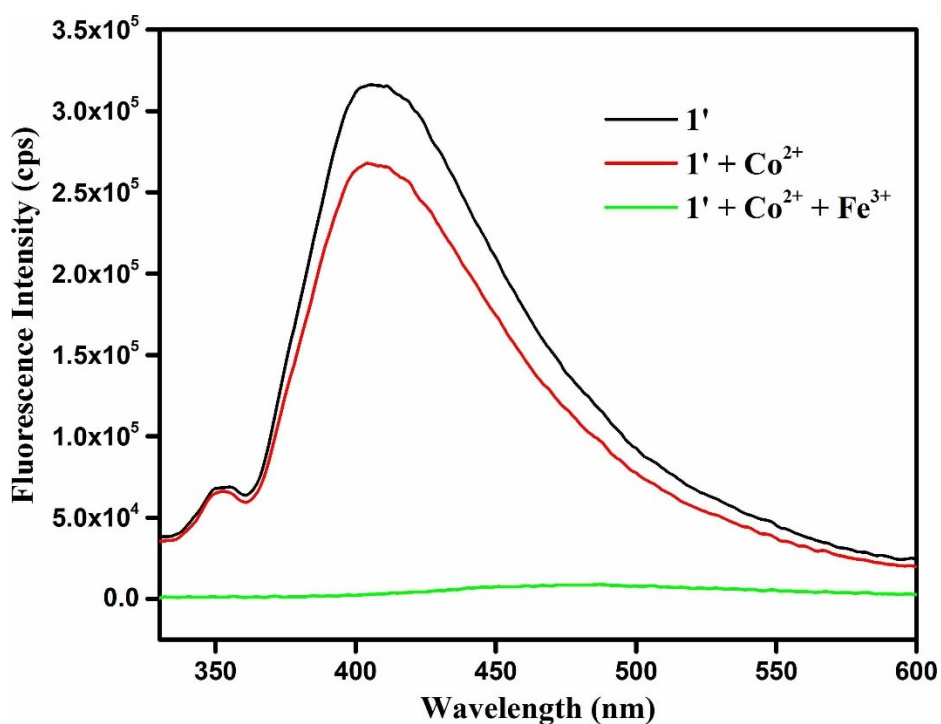

**Figure S22.** Change in the fluorescence intensity of **1'** upon addition of 10 mM Co<sup>2+</sup> solution (400  $\mu$ L) in presence of 10 mM Fe<sup>3+</sup> (400  $\mu$ L) solution.

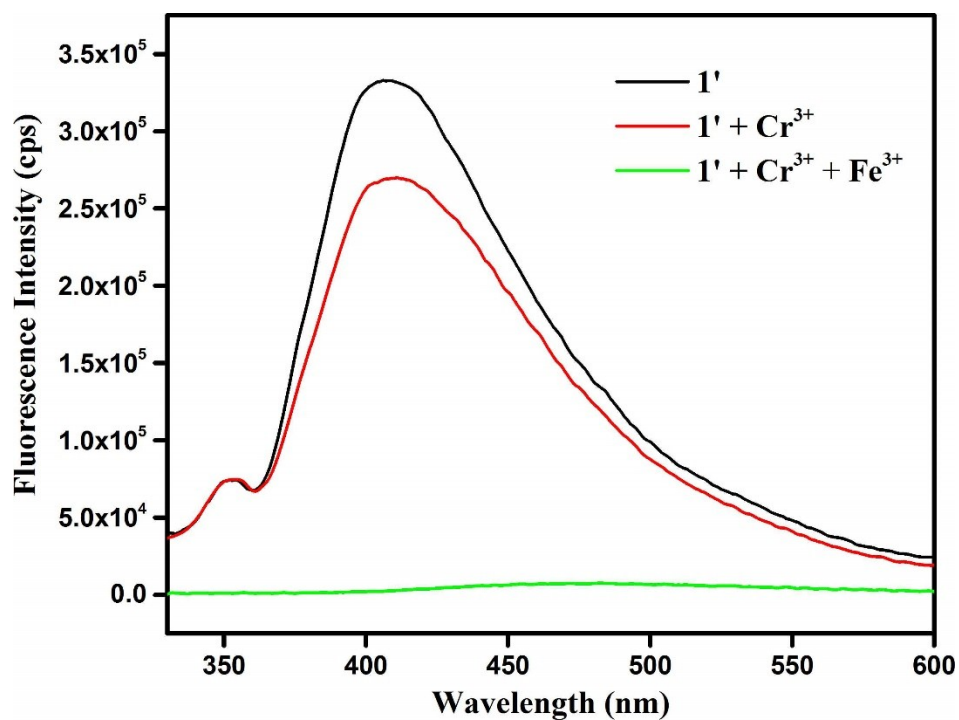

**Figure S23.** Change in the fluorescence intensity of **1'** upon addition of 10 mM Cr<sup>3+</sup> solution (400  $\mu$ L) in presence of 10 mM Fe<sup>3+</sup> (400  $\mu$ L) solution.

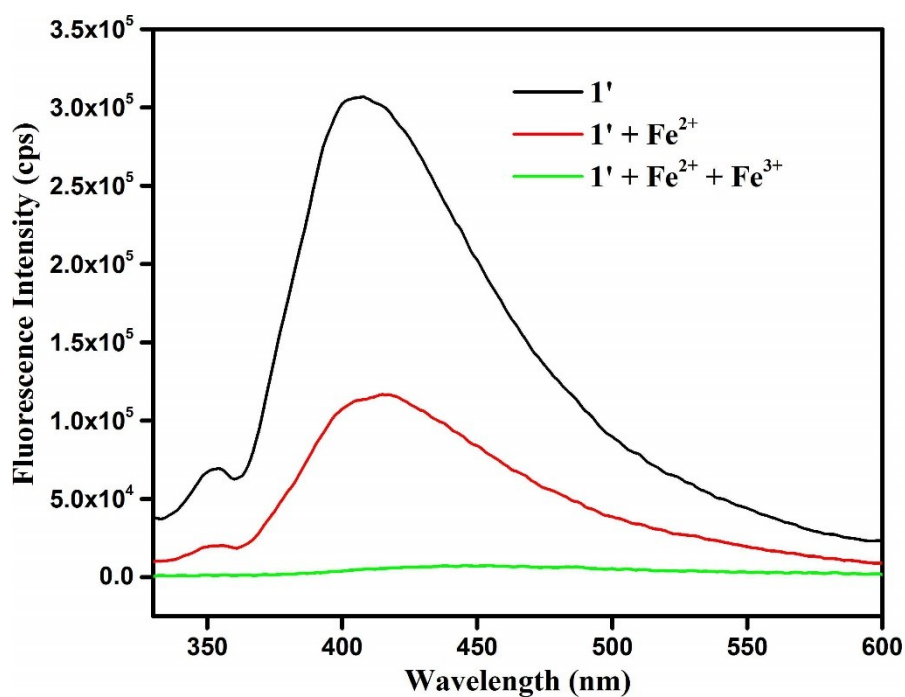

**Figure S24.** Change in the fluorescence intensity of **1'** upon addition of 10 mM Fe<sup>2+</sup> solution (400  $\mu$ L) in presence of 10 mM Fe<sup>3+</sup> (400  $\mu$ L) solution.

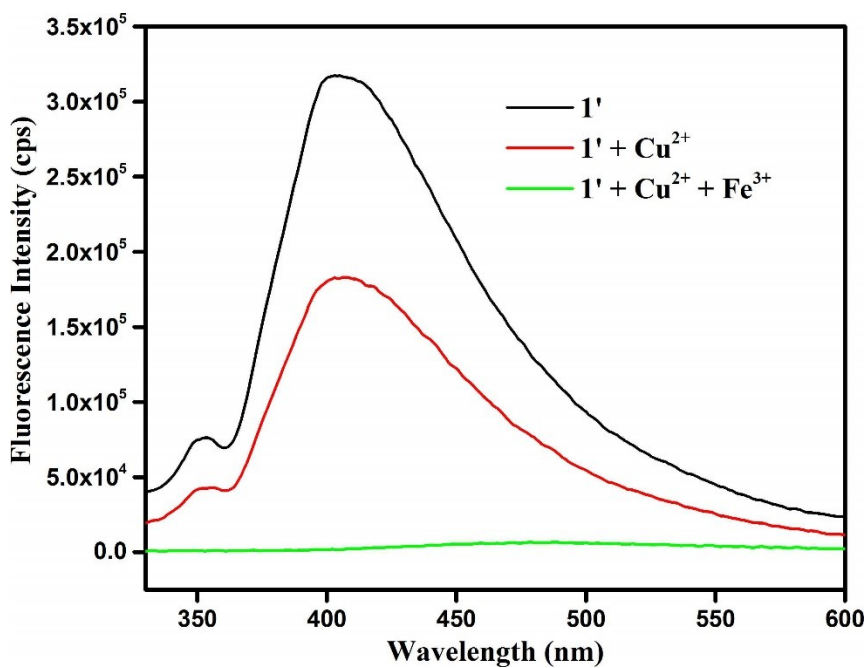

**Figure S25.** Change in the fluorescence intensity of **1'** upon addition of 10 mM Cu<sup>2+</sup> solution (400  $\mu$ L) in presence of 10 mM Fe<sup>3+</sup> (400  $\mu$ L) solution.

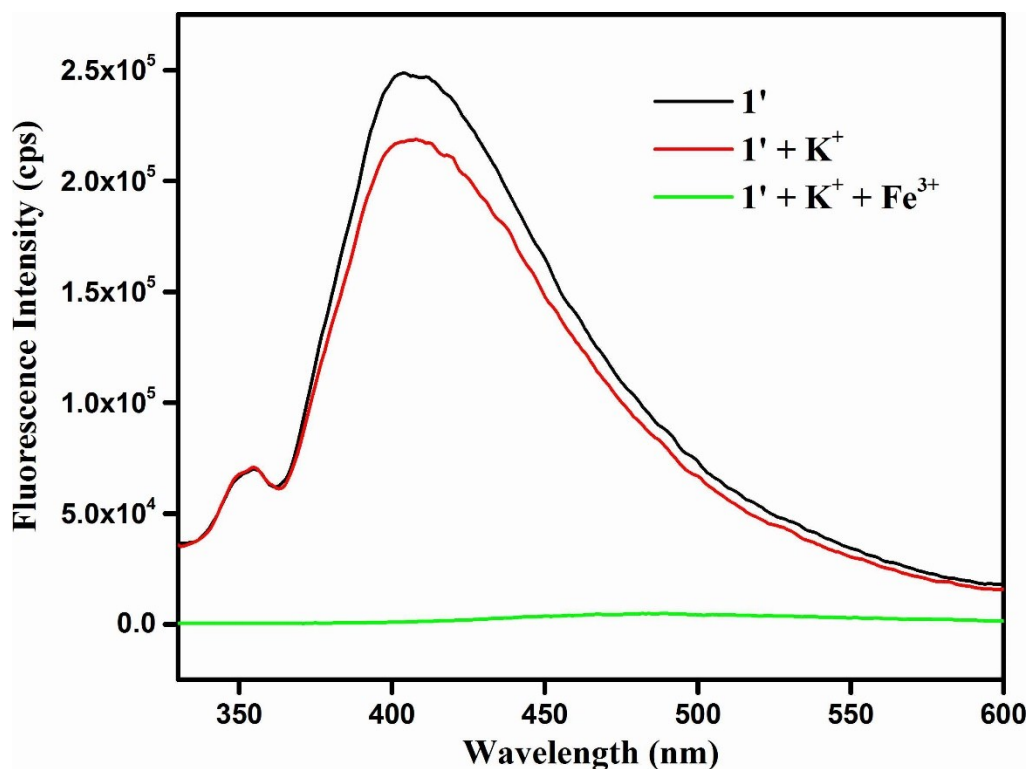

**Figure S26.** Change in the fluorescence intensity of **1'** upon addition of 10 mM K<sup>+</sup> solution (400  $\mu$ L) in presence of 10 mM Fe<sup>3+</sup> (400  $\mu$ L) solution.

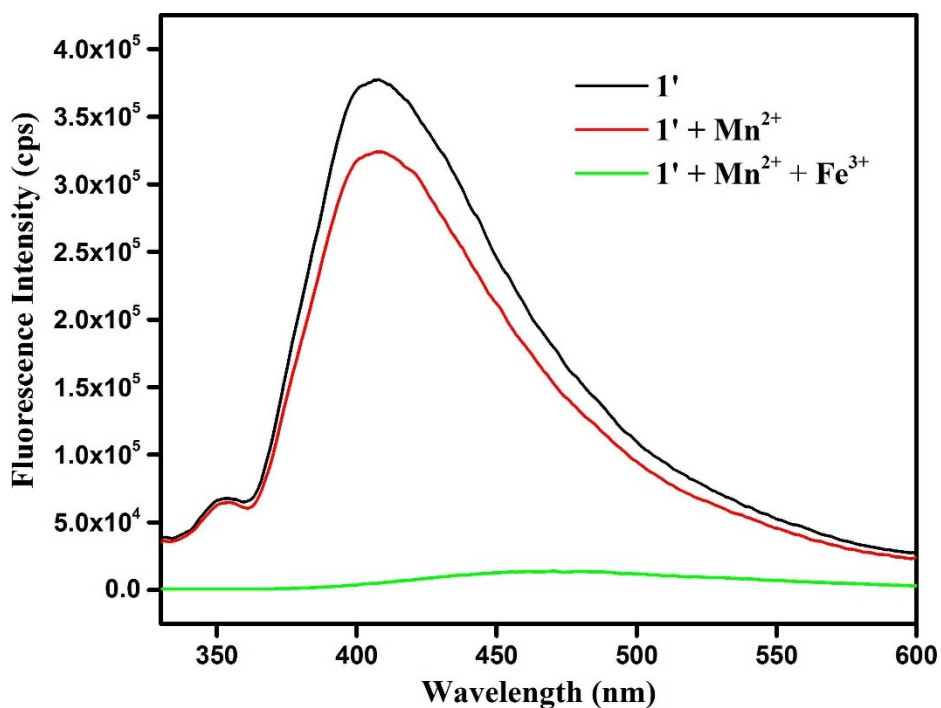

**Figure S27.** Change in the fluorescence intensity of **1'** upon addition of 10 mM Mn<sup>2+</sup> solution (400  $\mu$ L) in presence of 10 mM Fe<sup>3+</sup> (400  $\mu$ L) solution.

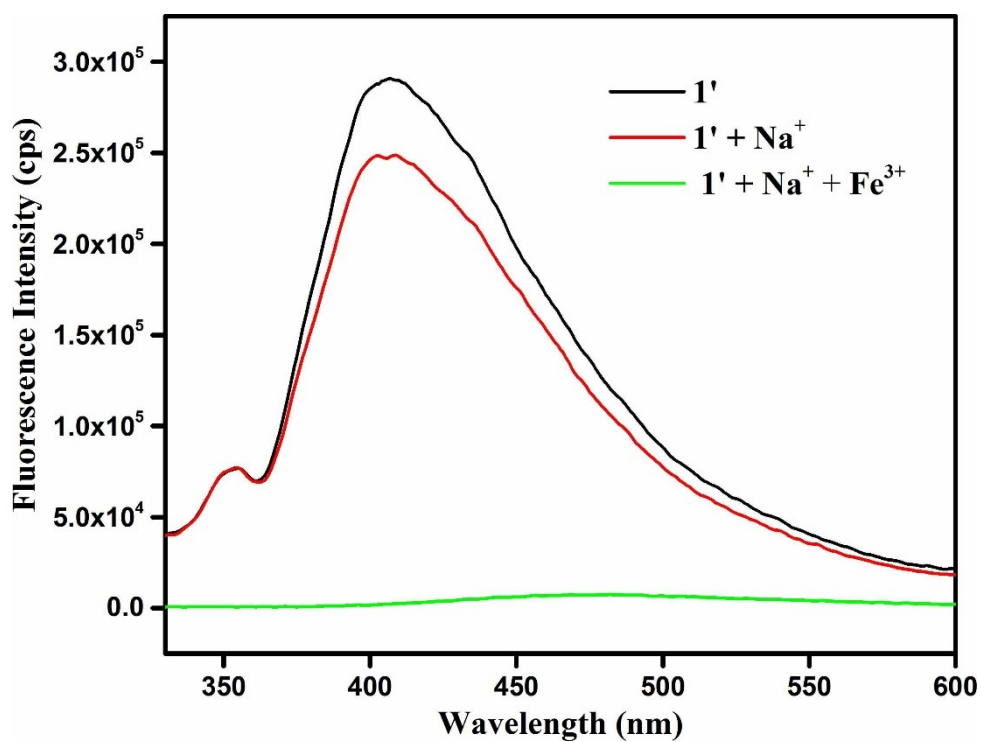

**Figure S28.** Change in the fluorescence intensity of **1'** upon addition of 10 mM Na<sup>+</sup> solution (400  $\mu$ L) in presence of 10 mM Fe<sup>3+</sup> (400  $\mu$ L) solution.

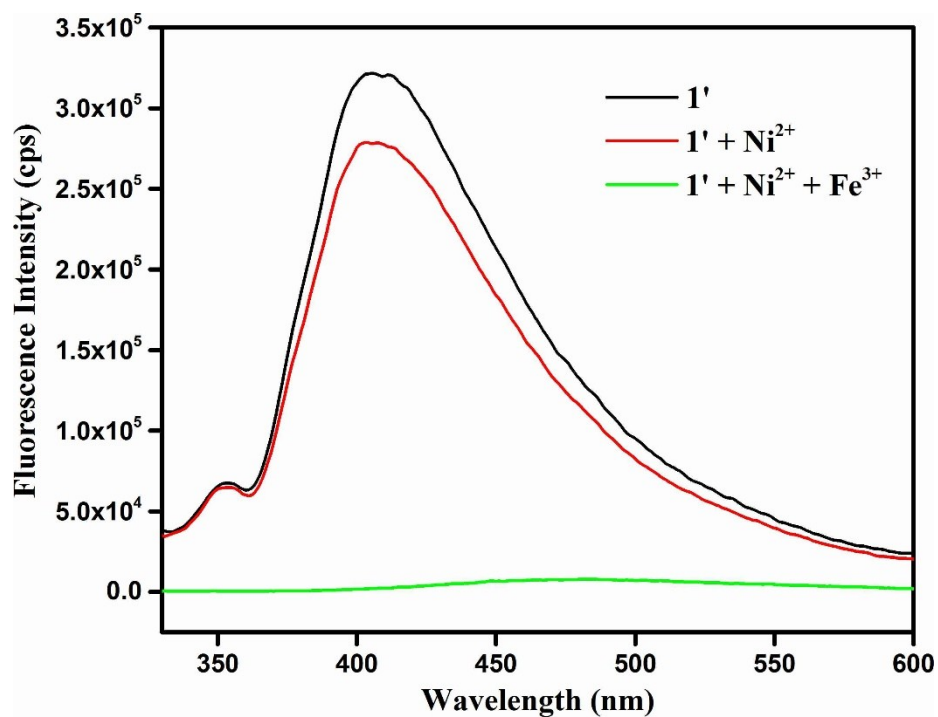

**Figure S29.** Change in the fluorescence intensity of **1'** upon addition of 10 mM Ni<sup>2+</sup> solution (400  $\mu$ L) in presence of 10 mM Fe<sup>3+</sup> (400  $\mu$ L) solution.

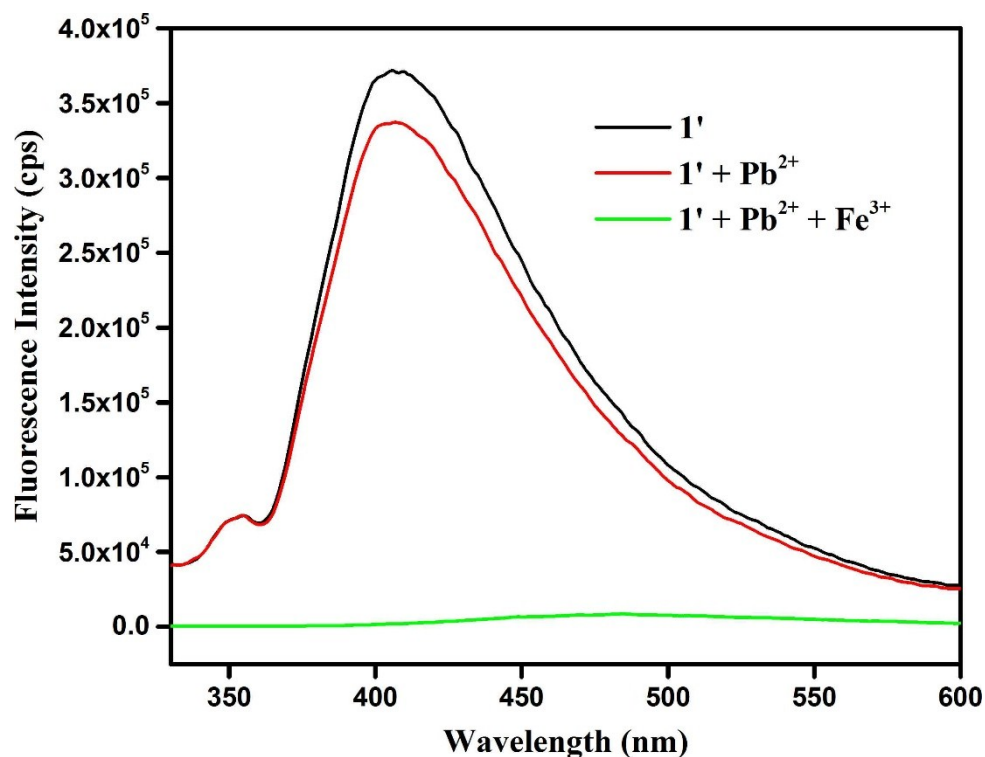

**Figure S30.** Change in the fluorescence intensity of **1'** upon addition of 10 mM Pb<sup>2+</sup> solution (400  $\mu$ L) in presence of 10 mM Fe<sup>3+</sup> (400  $\mu$ L) solution.

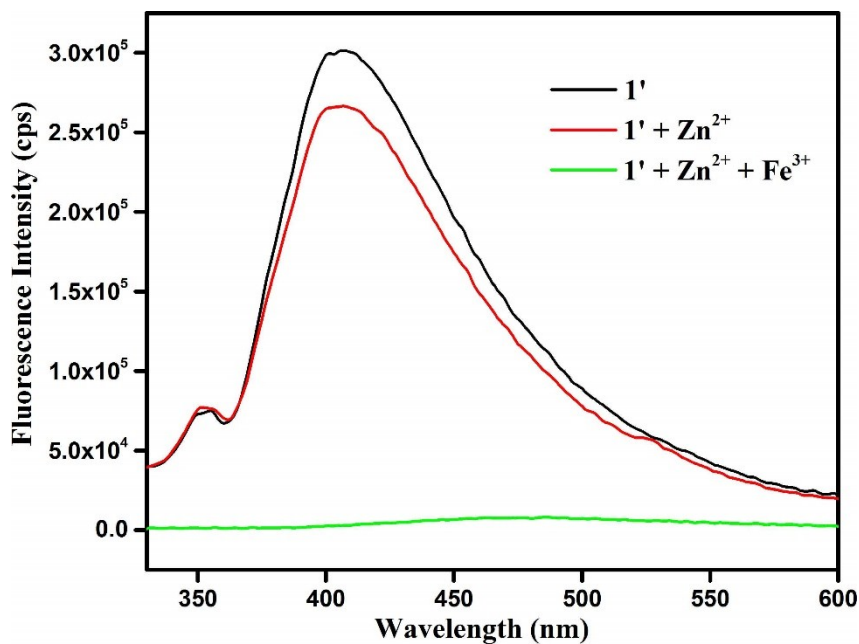

**Figure S31.** Change in the fluorescence intensity of **1'** upon addition of 10 mM  $Zn^{2+}$  solution (400  $\mu$ L) in presence of 10 mM  $Fe^{3+}$  (400  $\mu$ L) solution.

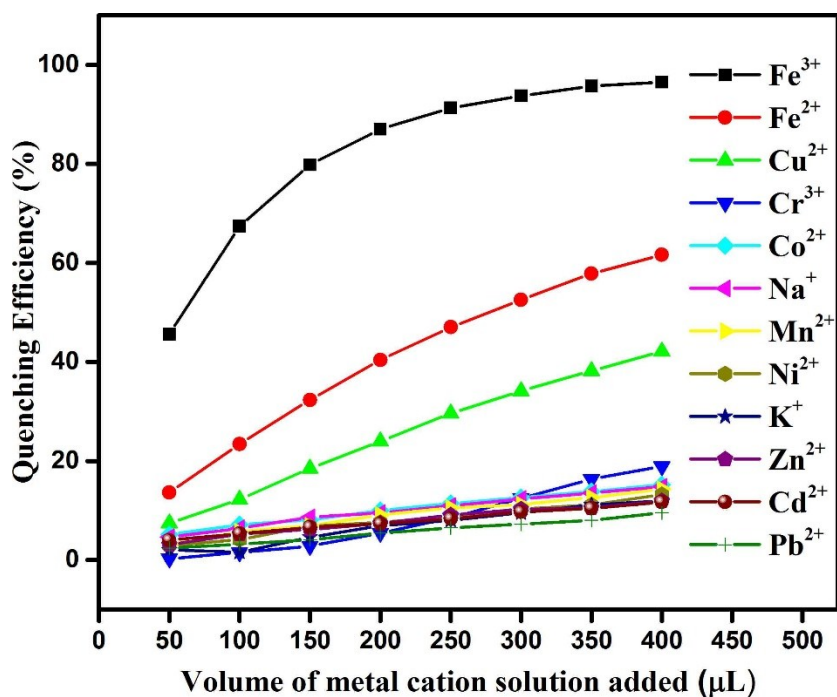

**Figure S32.** Change of fluorescence quenching efficiencies upon gradual addition of 10 mM solution of various metal cations to a 3 mL well-dispersed suspension of **1'** in methanol.

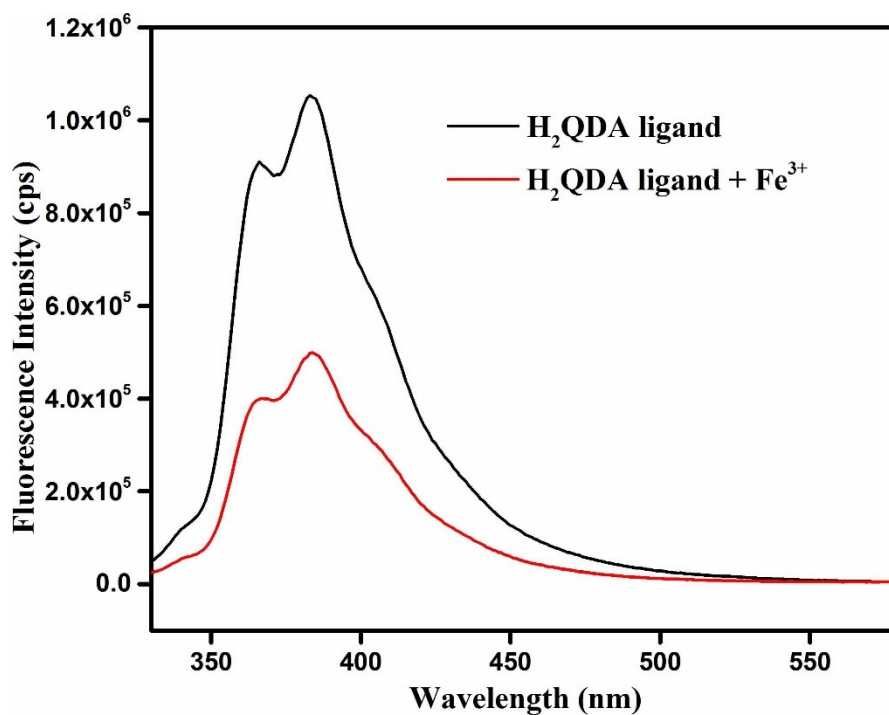

**Figure S33.** Change in the fluorescence intensity of H<sub>2</sub>QDA ligand upon the addition of 400  $\mu$ L of 10 mM Fe<sup>3+</sup> solution.

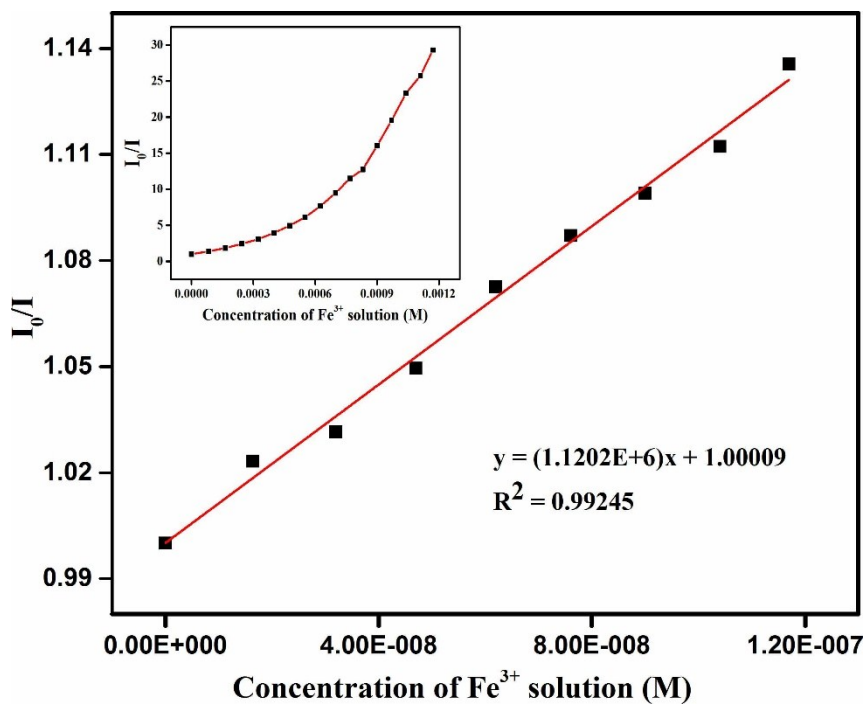

**Figure S34.** Stern-Volmer plot for the quenching of 1' at lower concentration of Fe<sup>3+</sup> solution. Inset: non-linearity of the Stern-Volmer plot at higher concentration of Fe<sup>3+</sup> solution.



**Table S6.** A comparison of the Stern-Volmer constant ( $K_{sv}$ ), detection limit and medium used for the sensing of  $Fe^{3+}$  ion for the MOFs reported till date.

| Sl. No. | MOF                                                                                                                                                                                   | $K_{sv}$ ( $M^{-1}$ ) | Detection Limit         | Medium Used  | Ref.      |
|---------|---------------------------------------------------------------------------------------------------------------------------------------------------------------------------------------|-----------------------|-------------------------|--------------|-----------|
| 1.      | [Zn(QDA)]·0.3DMF                                                                                                                                                                      | $1.12 \times 10^6$    | $2.30 \times 10^{-8}$ M | methanol     | This work |
| 2.      | [La(TPT)(DMSO) <sub>2</sub> ]·H <sub>2</sub> O                                                                                                                                        | $1.36 \times 10^4$    | -                       | ethanol      | 1         |
| 3.      | [H(H <sub>2</sub> O) <sub>8</sub> ][DyZn <sub>4</sub> (imdc) <sub>4</sub> (im) <sub>4</sub> ]                                                                                         | $2.88 \times 10^4$    | -                       | DMSO         | 2         |
| 4.      | EuL <sub>3</sub>                                                                                                                                                                      | $4.1 \times 10^3$     | $10^{-4}$ M             | ethanol      | 3         |
| 5.      | [Eu <sub>2</sub> (MFDA) <sub>2</sub> (HCOO) <sub>2</sub> (H <sub>2</sub> O) <sub>6</sub> ]·H <sub>2</sub> O                                                                           | -                     | $3.3 \times 10^{-7}$ M  | DMF          | 4         |
| 6.      | [Cd(H <sub>2</sub> L <sub>a</sub> ) <sub>0.5</sub> (H <sub>2</sub> L <sub>b</sub> ) <sub>0.5</sub> (H <sub>2</sub> O)]                                                                | -                     | $10^{-5}$ M             | water        | 5         |
| 7.      | [(CH <sub>3</sub> ) <sub>2</sub> NH <sub>2</sub> ]·[Tb(bptc)]·xsolvents                                                                                                               | -                     | 72.76 ppm               | ethanol      | 6         |
| 8.      | [Ln <sub>2</sub> (Ccbp) <sub>3</sub> ·6H <sub>2</sub> O]·3Cl <sup>-</sup> ·4H <sub>2</sub> O                                                                                          | $1.143 \times 10^5$   | -                       | ethanol      | 7         |
| 9.      | Eu <sup>3+</sup> @MIL-124                                                                                                                                                             | $3.87 \times 10^4$    | $0.28 \times 10^{-6}$ M | water        | 8         |
| 10.     | MIL-53(Al)                                                                                                                                                                            | -                     | $0.9 \times 10^{-6}$ M  | PBS buffer   | 9         |
| 11.     | [Ln(Hpzbc) <sub>2</sub> (NO <sub>3</sub> )]·H <sub>2</sub> O                                                                                                                          | -                     | $2.6 \times 10^{-5}$ M  | ethanol      | 10        |
| 12.     | [Tb(BTB)(DMF)]·1.5DMF·2.5H <sub>2</sub> O                                                                                                                                             | -                     | $10^{-5}$ M             | ethanol      | 11        |
| 13.     | [Tb <sub>4</sub> (OH) <sub>4</sub> (DSOA) <sub>2</sub> (H <sub>2</sub> O) <sub>8</sub> ]·(H <sub>2</sub> O) <sub>8</sub>                                                              | $3.5 \times 10^4$     | -                       | water        | 12        |
| 14.     | Tb <sup>3+</sup> @Cd-MOF                                                                                                                                                              | $1.108 \times 10^5$   | 0.010 mM                | DMF          | 13        |
| 15.     | [Zr <sub>6</sub> O <sub>4</sub> (OH) <sub>4</sub> (2,7-CDC) <sub>6</sub> ]·19H <sub>2</sub> O·2DMF                                                                                    | $5.5 \times 10^3$     | $9.10 \times 10^{-7}$ M | water        | 14        |
| 16.     | [Cd( <i>p</i> -CNPhHIDC)(4,4'-bipy) <sub>0.5</sub> ]                                                                                                                                  | $1.99 \times 10^3$    | $5 \times 10^{-3}$ M    | water        | 15        |
| 17.     | [Zn( <i>p</i> -CNPhHIDC)(4,4'-bipy)]                                                                                                                                                  | $1.37 \times 10^3$    | $5 \times 10^{-3}$ M    | water        | 15        |
| 18.     | [Zr <sub>6</sub> O <sub>6</sub> (OH) <sub>2</sub> (CF <sub>3</sub> COO) <sub>2</sub> (C <sub>11</sub> H <sub>5</sub> NO <sub>4</sub> ) <sub>4</sub> (H <sub>2</sub> O) <sub>4</sub> ] | $2.25 \times 10^7$    | $1.7 \times 10^{-9}$ M  | water        | 16        |
| 19.     | [Zr <sub>6</sub> O <sub>6</sub> (OH) <sub>2</sub> (CF <sub>3</sub> COO) <sub>2</sub> (C <sub>11</sub> H <sub>5</sub> NO <sub>4</sub> ) <sub>4</sub> (H <sub>2</sub> O) <sub>4</sub> ] | $1.91 \times 10^7$    | $2.7 \times 10^{-9}$ M  | HEPES buffer | 16        |
| 20.     | [Al(OH)(BDC-N <sub>3</sub> )]·1.2H <sub>2</sub> O·0.3DMF                                                                                                                              | $6.13 \times 10^3$    | $3 \times 10^{-8}$ M    | water        | 17        |

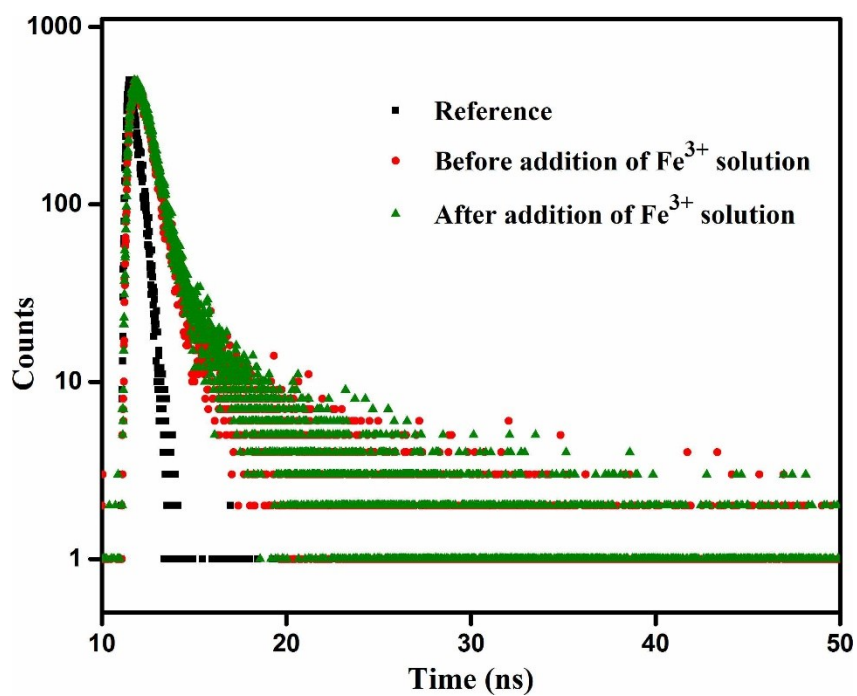

**Figure S35.** Lifetime decay profile of **1'** before and after addition of 50  $\mu\text{L}$  of 10 mM  $\text{Fe}^{3+}$  solution.

**Table S7.** Average excited-state lifetime ( $\langle\tau\rangle$ ) values of **1'** before and after the addition of 50  $\mu\text{L}$  of 10 mM  $\text{Fe}^{3+}$  solution ( $\lambda_{\text{ex}} = 310 \text{ nm}$ ).

| Volume of 10 mM $\text{Fe}^{3+}$ solution added ( $\mu\text{L}$ ) | $B_1$ | $B_2$ | $a_1$ | $a_2$ | $\tau_1$ (ns) | $\tau_2$ (ns) | $\langle\tau\rangle^*$ (ns) | $\chi^2$ |
|-------------------------------------------------------------------|-------|-------|-------|-------|---------------|---------------|-----------------------------|----------|
| 0                                                                 | 0.038 | 0.001 | 0.812 | 0.188 | 0.533         | 3.092         | 1.014                       | 1.01     |
| 50                                                                | 0.038 | 0.002 | 0.793 | 0.207 | 0.564         | 3.040         | 1.076                       | 1.08     |

\*  $\langle\tau\rangle = a_1\tau_1 + a_2\tau_2$

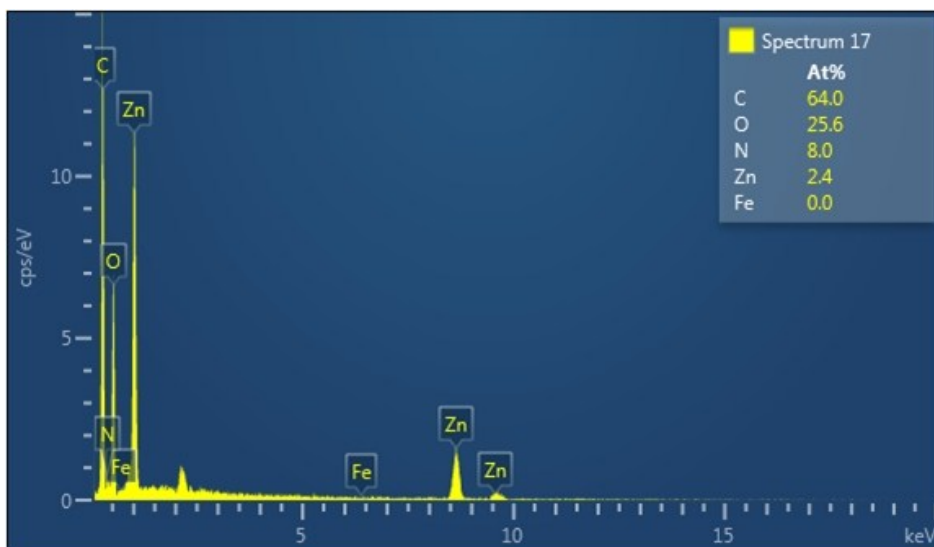

**Figure S36.** EDX spectrum of **1'** after treatment with 10 mM  $\text{Fe}^{3+}$  solution.

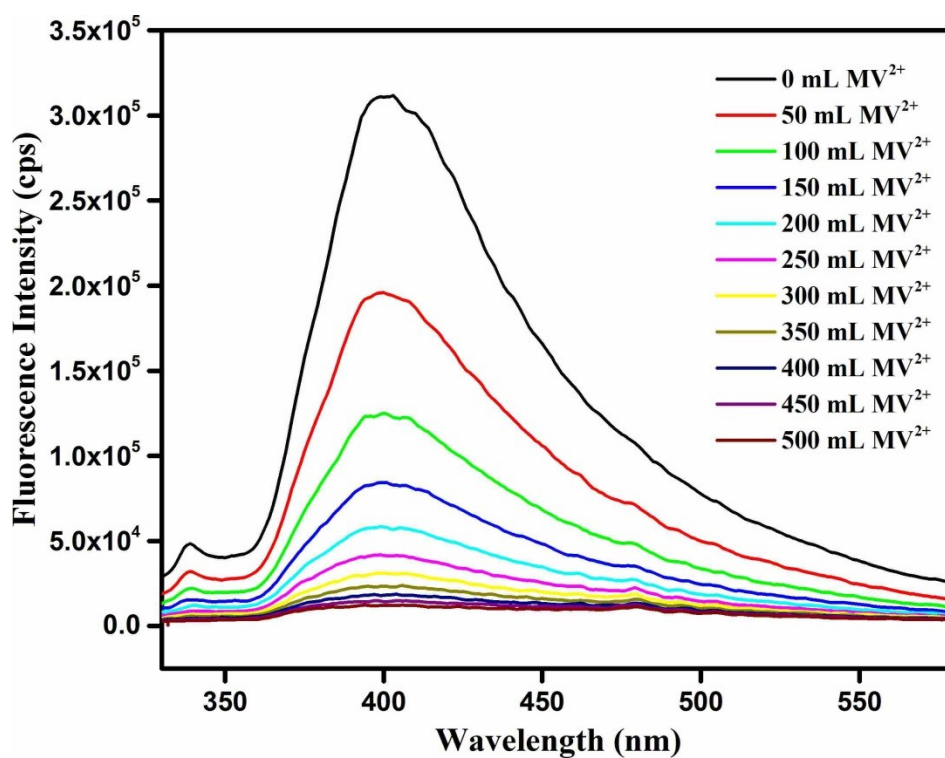

**Figure S37.** Quenching of the fluorescence intensity of **1'** by incremental addition of 10 mM  $\text{MV}^{2+}$  solution to a 3 mL stable suspension of **1'** in methanol.

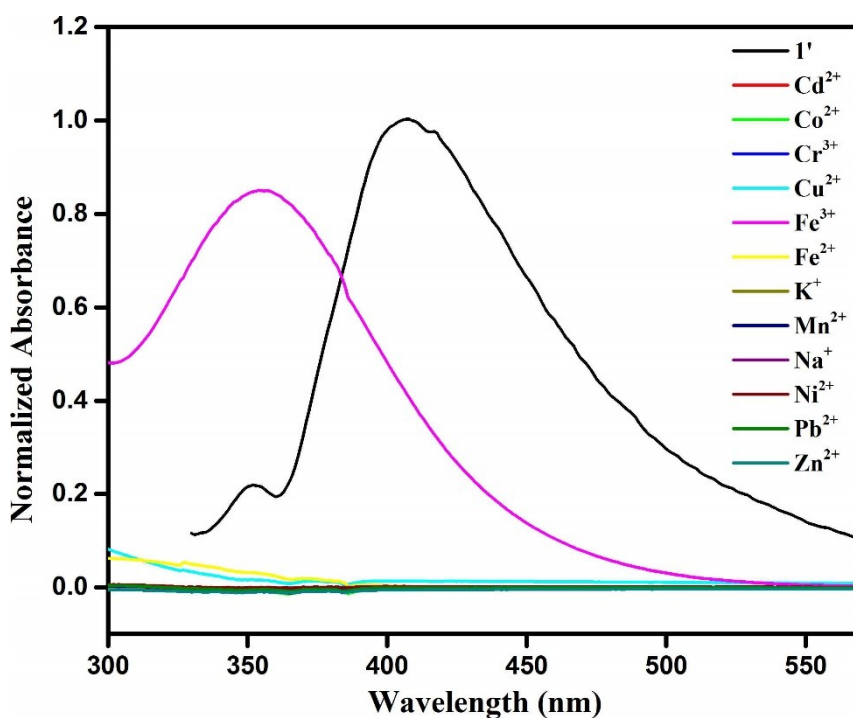

**Figure S38.** UV-Vis absorption spectra of the different metal ions ( $10 \times 10^{-3}$  M) solution in methanol. The emission spectra of **1'** (black color) (3 mg) dispersed in methanol (3 mL).

## REFERENCES

1. C. Zhang, Y. Yan, Q. Pan, L. Sun, H. He, Y. Liu, Z. Liang and J. Li, *Dalton Trans.*, 2015, **44**, 13340-13346.
2. Y.-F. Li, D. Wang, Z. Liao, Y. Kang, W.-H. Ding, X.-J. Zheng and L.-P. Jin, *J. Mater. Chem. C*, 2016, **4**, 4211-4217.
3. M. Zheng, H. Tan, Z. Xie, L. Zhang, X. Jing and Z. Sun, *ACS Appl. Mater. Interfaces*, 2013, **5**, 1078-1083.
4. X.-H. Zhou, L. Li, H.-H. Li, A. Li, T. Yanga and W. Huang, *Dalton Trans.*, 2013, **42**, 12403-12409.
5. Y. Wu, G.-P. Yang, Y. Zhang, N. Shi, J. Han and Y.-Y. Wang, *RSC Adv.*, 2015, **5**, 90772-90777.
6. X.-L. Zhao, D. Tian, Q. Gao, H.-W. Sun, J. Xu and X.-H. Bu, *Dalton Trans.*, 2016, **45**, 1040-1046.
7. K.-M. Wang, L. Du, Y.-L. Ma, J.-S. Zhao, Q. Wang, T. Yan and Q.-H. Zhao, *CrystEngComm.*, 2016, **18**, 2690-2700.
8. X.-Y. Xu and B. Yan, *ACS Appl. Mater. Interfaces*, 2015, **7**, 721-729.
9. C.-X. Yang, H.-B. Ren and X.-P. Yan, *Anal. Chem.*, 2013, **85**, 7441-7446.
10. G.-P. Li, G. Liu, Y.-Z. Li, L. Hou, Y.-Y. Wang and Z. Zhu, *Inorg. Chem.*, 2016, **55**, 3952-3959.
11. H. Xu, H.-C. Hu, C.-S. Cao and B. Zhao, *Inorg. Chem.*, 2015, **54**, 4585-4587.
12. X.-Y. Dong, R. Wang, J.-Z. Wang, S.-Q. Wang and T. C. W. Mak, *J. Mater. Chem. A*, 2015, **3**, 641-647.
13. H. Weng and B. Yan, *Sens. Actuator B-Chem.*, 2016, **228**, 702-708.
14. A. Das and S. Biswas, *Sens. Actuator B-Chem.*, 2017, **250**, 121-131.

15. J. Zhang, L. Zhao, Y. Liu, M. Li, G. Li and X. Meng, *New J.Chem.*, 2018, **42**, 6839-6847.
16. C. Gogoi and S. Biswas, *Dalton Trans.*, 2018, doi: 10.1039/C1038DT03058H.
17. A. Das, S. Banesh, V. Trivedi and S. Biswas, *Dalton Trans.*, 2018, **47**, 2690-2700.
